# Supplementary material for: Digital Education for Health Professions on Smoking Cessation Management: Systematic Review by the Digital Health Education Collaboration
Source: PubMed Central journal article supplement (PMC6421523; doi:10.2196/13000), 2019-03-04
Supplement: jmir_v21i3e13000_app2.pdf [file jmir_v21i3e13000_app2.pdf]

**Multimedia Appendix 2: Results of Included Studies**

| Studies                                        | Outcomes                                                                                                  |       |                                                                   |                                                                                                    |                                                                                                |                                                                                                                                       |      |
|------------------------------------------------|-----------------------------------------------------------------------------------------------------------|-------|-------------------------------------------------------------------|----------------------------------------------------------------------------------------------------|------------------------------------------------------------------------------------------------|---------------------------------------------------------------------------------------------------------------------------------------|------|
|                                                | Knowledge                                                                                                 | Skill | Attitude                                                          | Satisfaction                                                                                       | Practice and Behavior change                                                                   | Self-efficacy                                                                                                                         | Cost |
| <b>Digital education versus usual learning</b> |                                                                                                           |       |                                                                   |                                                                                                    |                                                                                                |                                                                                                                                       |      |
| Chaikoolvatana 2009 [36]                       | Knowledge of 5As <sup>a</sup> and case scenarios of smoking cessation counselling<br><b>Post-test MCQ</b> | -     | -                                                                 | -                                                                                                  | -                                                                                              | Self-rated smoking cessation skill<br><b>Questionnaire</b><br><i>Participants (73.34%) reported improvements in counselling skill</i> | -    |
| Galal 2015 [37]                                | -                                                                                                         | -     | Attitude towards using teaching tool (SRS)<br><b>Likert scale</b> | -                                                                                                  |                                                                                                | -                                                                                                                                     | -    |
| Gordon 2013 [32]                               | -                                                                                                         | -     | Attitude towards training<br><b>Likert scale</b>                  | Satisfaction survey to assess website design, organization, and ease of use<br><b>Likert scale</b> | Change in behavior (sum of 4 factors - ask, assess, advice, and assist)<br><b>Likert scale</b> | Self-rated efficacy towards providing tobacco cessation interventions<br><b>Likert scale</b>                                          | -    |

|                                                |                                                                |                                                                                                        |   |                                              |                                                                                                                               |                                                                                                                                                               |                                          |
|------------------------------------------------|----------------------------------------------------------------|--------------------------------------------------------------------------------------------------------|---|----------------------------------------------|-------------------------------------------------------------------------------------------------------------------------------|---------------------------------------------------------------------------------------------------------------------------------------------------------------|------------------------------------------|
|                                                |                                                                |                                                                                                        |   | <i>Higher satisfaction with the training</i> |                                                                                                                               |                                                                                                                                                               |                                          |
| Young 2002 [29]                                | Knowledge of health effects of smoking<br><b>Post-test MCQ</b> | Smoking cessation techniques<br><b>Likert scale</b><br><i>small improvements in intervention group</i> | - | -                                            | Readiness to change (interest in changing current practice)<br><b>Likert scale</b><br><i>no difference between two groups</i> | Self-assessed competence in smoking cessation advice<br><b>Visual analog scale</b><br><i>Significantly higher self-efficacy in intervention group (p=.03)</i> | -                                        |
| <b>Blended education versus usual learning</b> |                                                                |                                                                                                        |   |                                              |                                                                                                                               |                                                                                                                                                               |                                          |
| Butler 2013 [31]                               | -                                                              | -                                                                                                      | - | -                                            | -                                                                                                                             | -                                                                                                                                                             | <b>Cost per practice</b><br>£<br>1597.40 |
| Hymowitz 2007 [28]                             | -                                                              | Interviewing and tobacco intervention skill<br><b>OSCE scores</b>                                      | - | -                                            | Readiness to change (feeling prepared to help patients quit smoking)<br><b>Survey</b>                                         | -                                                                                                                                                             | -                                        |
| Ockene 2015 [34]                               | -                                                              | Tobacco treatment skill                                                                                | - | -                                            | -                                                                                                                             | Self-reported skill for behavior and                                                                                                                          | -                                        |

|                                                   |                                                                                                                                        |                                                   |                                                                                                      |                                                                                                    |                                                                                                     |                                                                                                                        |   |
|---------------------------------------------------|----------------------------------------------------------------------------------------------------------------------------------------|---------------------------------------------------|------------------------------------------------------------------------------------------------------|----------------------------------------------------------------------------------------------------|-----------------------------------------------------------------------------------------------------|------------------------------------------------------------------------------------------------------------------------|---|
|                                                   |                                                                                                                                        | <b>OSCE scores</b>                                |                                                                                                      |                                                                                                    |                                                                                                     | pharmacotherapy<br>counselling<br><b>Questionnaire</b><br><i>Higher self-efficacy in intervention group</i><br>(p<.05) |   |
| <b>Digital education versus digital education</b> |                                                                                                                                        |                                                   |                                                                                                      |                                                                                                    |                                                                                                     |                                                                                                                        |   |
| Bonewski 1999<br>[27]                             | -                                                                                                                                      | Smoking status classification<br><b>checklist</b> | -                                                                                                    | -                                                                                                  | -                                                                                                   | -                                                                                                                      | - |
| Stoner 2014<br>[33]                               | Knowledge of SBIRT core curriculum and motivational counselling<br><b>Post-test MCQs</b><br><i>knowledge improvement with training</i> | -                                                 | -                                                                                                    | Post-training satisfaction<br><b>Questionnaire</b><br><i>Higher satisfaction with the training</i> | Clinical practice behavior change<br><b>Likert scale</b><br><i>no difference between two groups</i> | Self-efficacy for counselling patients<br><b>Likert scale</b><br><i>no difference between two groups</i>               | - |
| <b>Blended education versus digital education</b> |                                                                                                                                        |                                                   |                                                                                                      |                                                                                                    |                                                                                                     |                                                                                                                        |   |
| Brunette 2015<br>[30]                             | Knowledge about treating nicotine dependence<br><b>Post-test Questionnaire</b><br><i>no difference between two groups</i>              | -                                                 | Attitude towards video-conference sessions<br><b>Post-test Questionnaire</b><br><i>no difference</i> | -                                                                                                  | -                                                                                                   | -                                                                                                                      | - |

|                 |                                                                |                                                           |                               |                                                    |  |                                                                        |   |
|-----------------|----------------------------------------------------------------|-----------------------------------------------------------|-------------------------------|----------------------------------------------------|--|------------------------------------------------------------------------|---|
|                 |                                                                |                                                           | <i>between<br/>two groups</i> |                                                    |  |                                                                        |   |
| Stolz 2012 [35] | Knowledge of health effects of smoking<br><b>Post-test MCQ</b> | Smoking cessation counselling skill<br><b>OSCE scores</b> | -                             | Post-training satisfaction<br><b>Post-test MCQ</b> |  | Self-rated smoking cessation counselling skill<br><b>Questionnaire</b> | - |

Footnotes: <sup>a</sup> = ask, advise, assess, assist and arrange; OSCE = objective structured clinical examination; SMD = standardized mean difference; MCQ = multiple choice question; RR = Relative Risk
